# Supplementary material for: Monolithic stationary phases prepared via cyclic anhydride ring-opening polymerization as tunable platforms for chromatographic applications
Source: Royal Society of Chemistry journal article supplement (doi:10.1039/d4ay00251b), 2024-01-01
Supplement: d4ay00251b1.pdf [file d4ay00251b1.pdf]

## Electronic Supplementary Information

Monolith stationary phases prepared via cyclic anhydride ring-opening polymerization as  
tunable platforms for chromatographic applications

Ahmad Aqel\*, Ayman A. Ghfar, Ahmed-Yacine Badjah-Hadj-Ahmed, Zeid A. ALOthman

Department of Chemistry, College of Science, King Saud University, Riyadh, KSA  
P.O. Box 2455 Riyadh 11451 Saudi Arabia

\*Corresponding Author:

**Ahmad Aqel:**

Tel.: +966 11 4676009

E-mail: aifseisi@ksu.edu.sa

Fax: +96614675992

### Summary

This electronic supplementary material file includes additional results and information as described in the text of the main article, including:

Figures S1–S5.

Tables S1 & S2.

References related the comparison study.

Fig. S1

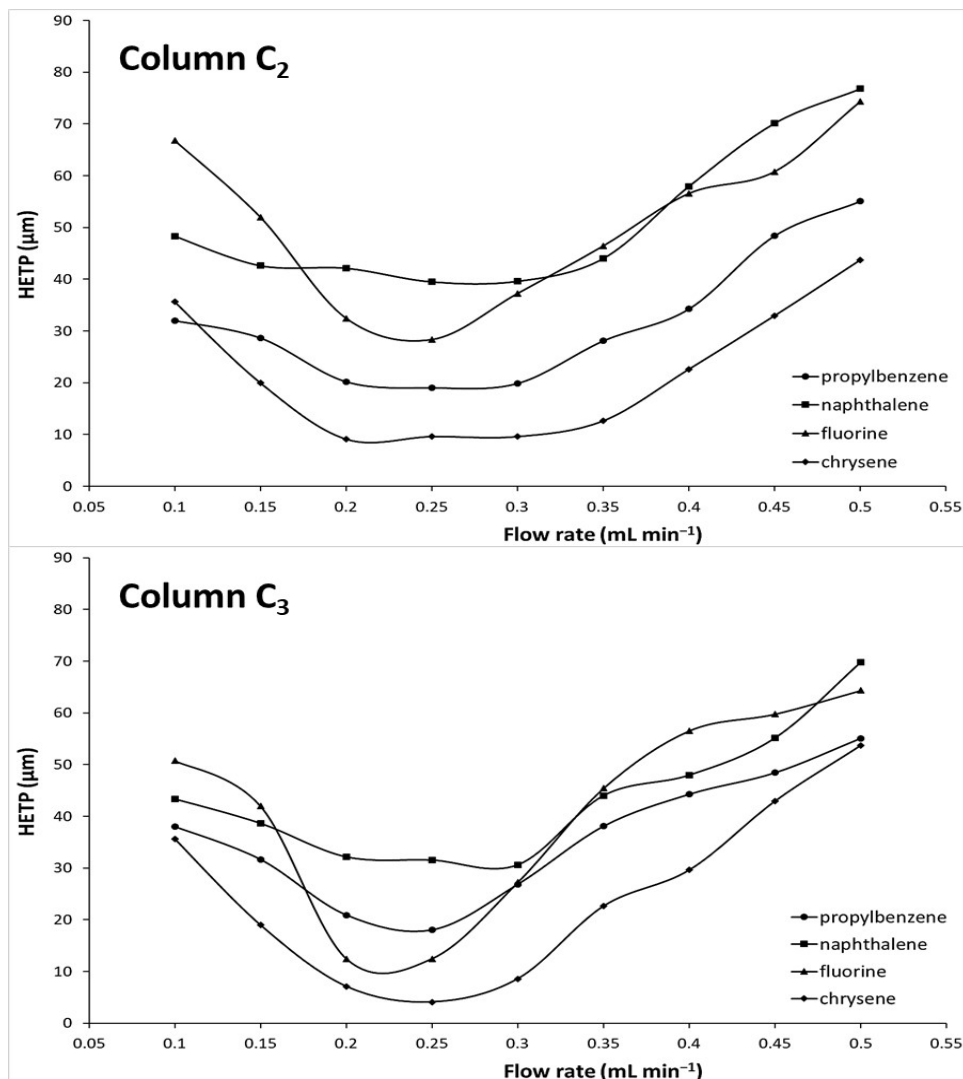

Fig. S1 Van Deemter curves for some of the studied compounds injected in C<sub>2</sub> and C<sub>3</sub> columns.

**Table S1**

Table S1 Repeatability (in terms of run-to-run and day-to-day) and reproducibility (in terms of column-to-column) studies for the prepared columns.

| Column           | Solute | C <sub>2</sub> column |          | C <sub>3</sub> column |          | <i>R<sub>s</sub></i> | butylbenzene         |          | pentylbenzene        |          | <i>R<sub>s</sub></i> |
|------------------|--------|-----------------------|----------|-----------------------|----------|----------------------|----------------------|----------|----------------------|----------|----------------------|
|                  |        | <i>t<sub>R</sub></i>  | <i>H</i> | <i>t<sub>R</sub></i>  | <i>H</i> |                      | <i>t<sub>R</sub></i> | <i>H</i> | <i>t<sub>R</sub></i> | <i>H</i> |                      |
| Run-to-run       | 1      | 3.31                  | 20.75    | 4.12                  | 23.28    | 2.36                 | 4.23                 | 18.93    | 5.55                 | 15.32    | 3.94                 |
|                  | 2      | 3.28                  | 22.30    | 4.11                  | 23.76    | 2.53                 | 4.22                 | 16.85    | 5.56                 | 17.91    | 3.81                 |
|                  | 3      | 3.29                  | 22.94    | 4.13                  | 26.07    | 2.66                 | 4.22                 | 17.93    | 5.55                 | 17.47    | 3.69                 |
|                  | 4      | 3.29                  | 18.47    | 4.11                  | 26.88    | 2.48                 | 4.23                 | 20.81    | 5.53                 | 15.50    | 3.94                 |
|                  | 5      | 3.28                  | 19.07    | 4.10                  | 25.13    | 2.43                 | 4.23                 | 19.78    | 5.53                 | 15.02    | 3.92                 |
|                  | Avg.   | 3.29                  | 20.71    | 4.11                  | 25.02    | 2.49                 | 4.23                 | 18.86    | 5.54                 | 16.24    | 3.86                 |
|                  | %RSD   | 0.37                  | 9.42     | 0.28                  | 6.06     | 4.53                 | 0.13                 | 8.20     | 0.24                 | 8.25     | 2.83                 |
| Day-to-day       | 1      | 3.29                  | 20.71    | 4.11                  | 25.02    | 2.49                 | 4.23                 | 18.86    | 5.54                 | 16.24    | 3.86                 |
|                  | 2      | 3.27                  | 18.63    | 4.13                  | 26.76    | 2.50                 | 4.23                 | 15.75    | 5.58                 | 15.72    | 3.92                 |
|                  | 3      | 3.27                  | 21.40    | 4.09                  | 26.07    | 2.82                 | 4.24                 | 16.84    | 5.57                 | 18.33    | 3.81                 |
|                  | 4      | 3.26                  | 18.05    | 4.13                  | 23.88    | 2.65                 | 4.21                 | 18.15    | 5.55                 | 18.04    | 3.98                 |
|                  | 5      | 3.25                  | 22.66    | 4.12                  | 23.13    | 2.71                 | 4.21                 | 18.62    | 5.54                 | 19.28    | 3.91                 |
|                  | Avg.   | 3.27                  | 20.29    | 4.12                  | 24.97    | 2.63                 | 4.22                 | 17.64    | 5.56                 | 17.52    | 3.90                 |
|                  | %RSD   | 0.45                  | 9.48     | 0.41                  | 6.00     | 5.35                 | 0.32                 | 7.46     | 0.33                 | 8.51     | 1.65                 |
| Column-to-column | 1      | 3.27                  | 20.29    | 4.12                  | 24.97    | 2.63                 | 4.23                 | 17.64    | 5.56                 | 17.52    | 3.90                 |
|                  | 2      | 3.88                  | 31.04    | 4.81                  | 32.33    | 2.28                 | 4.61                 | 27.73    | 6.12                 | 29.01    | 3.97                 |
|                  | 3      | 2.93                  | 24.33    | 3.85                  | 27.01    | 2.58                 | 3.84                 | 24.70    | 5.03                 | 24.90    | 3.32                 |
|                  | 4      | 3.49                  | 28.14    | 4.07                  | 33.82    | 2.51                 | 4.06                 | 22.43    | 5.27                 | 21.65    | 3.56                 |
|                  | Avg.   | 3.41                  | 25.98    | 4.24                  | 29.53    | 2.50                 | 4.19                 | 23.13    | 5.50                 | 23.27    | 3.69                 |
|                  | %RSD   | 11.14                 | 18.11    | 10.94                 | 14.28    | 6.58                 | 7.77                 | 18.39    | 8.55                 | 20.95    | 8.23                 |

*t<sub>R</sub>*: retention time (min), *H*: height equivalent to theoretical plates (μm), and *R<sub>s</sub>*: resolution factor.

**Fig. S2**

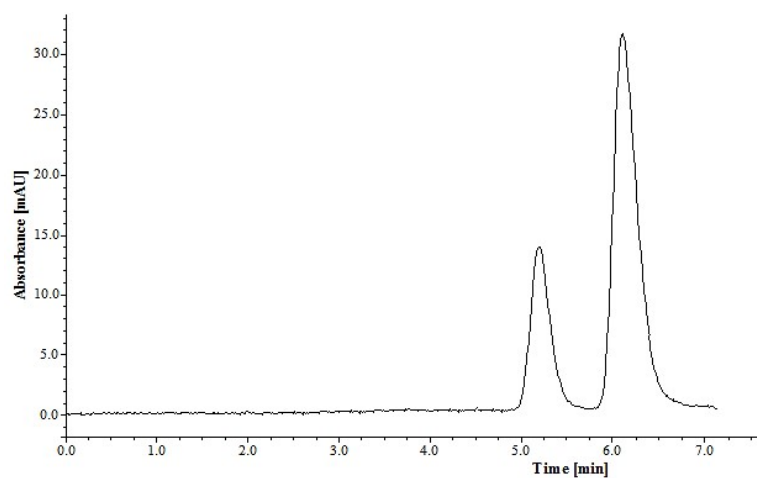

Fig. S2 Separation chromatogram of caffeine and ibuprofen extracted from Profinal-XP tablets using C<sub>3</sub> column. Conditions: mobile phase: acetonitrile/water with 0.1% formic acid (60/40, v/v), flow rate: 0.30 mL min<sup>-1</sup>, detection wavelength: UV at 215 nm, column temperature: 30°C. Peaks identification by order of elution: 1- caffeine and 2- ibuprofen.

**Fig. S3**

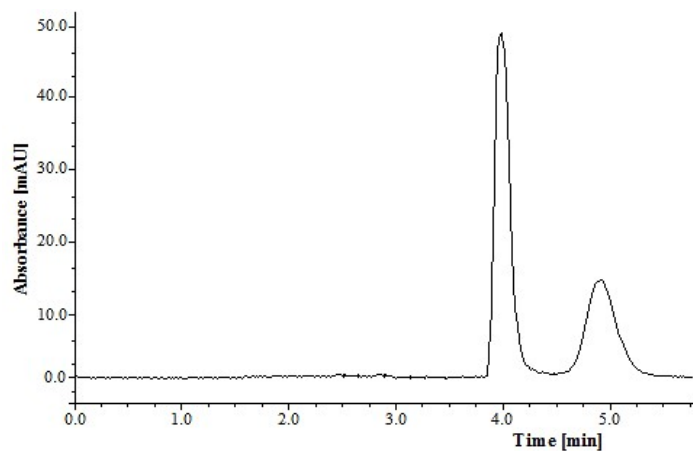

Fig. S3 Separation chromatogram of paracetamol and chlorzoxazone extracted from Relaxon capsules using C<sub>3</sub> column. Conditions: mobile phase: acetonitrile/water with 0.1% formic acid (55/45, v/v), flow rate: 0.25 mL min<sup>-1</sup>, detection wavelength: UV at 270 nm, column temperature: 30°C. Peaks identification by order of elution: 1- paracetamol and 2- chlorzoxazone.

**Fig. S4**

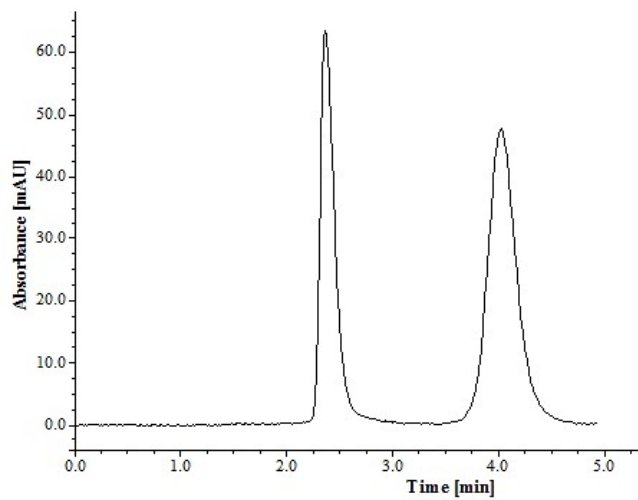

Fig. S4 Separation chromatogram of vitamin-C and aspirin extracted from Aspirin-C tablets using C<sub>2</sub> column. Conditions: mobile phase: acetonitrile/water with 0.1% formic acid (75/25, v/v), flow rate: 0.35 mL min<sup>-1</sup>, detection wavelength: UV at 230 nm, column temperature: 30°C. Peaks identification by order of elution: 1- vitamin-C and 2- aspirin.

Fig. S5

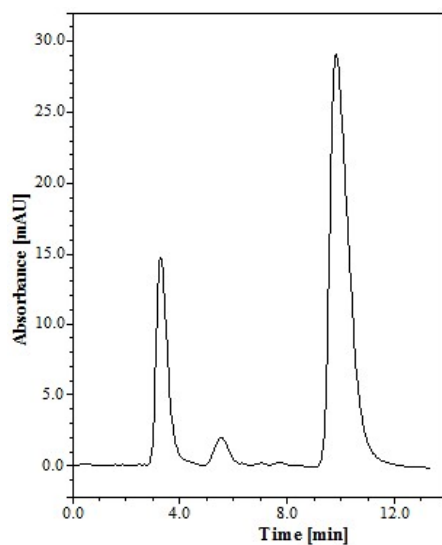

Fig. S5 Separation chromatogram of the black tea hot water extract using C<sub>2</sub> column. Conditions: mobile phase: acetonitrile/water with 0.1% formic acid (35/65, v/v), flow rate: 0.20 mL min<sup>-1</sup>, detection wavelength: UV at 273 nm, column temperature: 30°C. Peaks identification by order of elution: 1- gallic acid, 2- theobromine, and 3- caffeine.

**Table S2**

Table S2 Comparison of the prepared columns with other reported HPLC methods (published in 2014 and beyond) for the separation of PAH compounds.

| Stationary phases                                  | Analytes | Column<br>(length × i.d. mm) | Mobile phase<br>composition & mode                   | Flow rate<br>(mL min <sup>-1</sup> ) | Chromatographic<br>evaluation <sup>1</sup>                         | Run time<br>(min) | Ref. |
|----------------------------------------------------|----------|------------------------------|------------------------------------------------------|--------------------------------------|--------------------------------------------------------------------|-------------------|------|
| Zorbax SB-C18,<br>3.5 μm                           | 5 PAHs   | 100 × 2.1                    | Acetonitrile/water<br>Isocratic elution              | 0.2                                  | ND <sup>2</sup>                                                    | 8                 | [1]  |
| Eclipse XDB-C18,<br>5 μm                           | 6 PAHs   | 150 × 4.6                    | Methanol/water<br>Isocratic elution                  | 0.5                                  | ND                                                                 | 26                | [2]  |
| Acquity UPLC BEH<br>C18, 1.7 μm                    | 4 PAHs   | 50 × 2.1                     | Acetonitrile/water<br>Isocratic elution              | 0.5                                  | ND                                                                 | 4.5               | [3]  |
| Poly(benzyl<br>methacrylate)                       | 3 PAHs   | 200 × 0.32                   | Acetonitrile/water<br>Isocratic elution              | 6<br>μL min <sup>-1</sup>            | $R_s$ : 5.2–5.8<br>$N$ : 5,520–10,180<br>plates m <sup>-1</sup>    | 16                | [4]  |
| H5-ODS C18, 5<br>μm                                | 5 PAHs   | 150 × 4.6                    | Acetonitrile/water<br>Isocratic elution              | 0.8                                  | ND                                                                 | 19                | [5]  |
| Sporopollenin-<br>poly(hexyl<br>methacrylate)      | 3 PAHs   | 150 × 0.32                   | Acetonitrile/water<br>Isocratic elution              | 40<br>μL min <sup>-1</sup>           | $R_s$ : 1.7–4.2<br>$N$ : 1,072– 5,347<br>plates m <sup>-1</sup>    | 7.5               | [6]  |
| Zorbax Eclipse<br>Plus C18, 5 μm                   | 5 PAHs   | 150 × 4.6                    | Methanol/water<br>Isocratic elution                  | 1.0                                  | ND                                                                 | 8                 | [7]  |
| Sporopollenin-<br>poly(hexyl<br>methacrylate)      | 3 PAHs   | 150 × 0.32                   | Acetonitrile/water<br>Isocratic elution              | 15<br>μL min <sup>-1</sup>           | $R_s$ : 1.52–1.74<br>$N$ : 3,000–13,100<br>plates m <sup>-1</sup>  | 1.75              | [8]  |
| Spheri-5 ODS, 5<br>μm                              | 4 PAHs   | 250 × 4.6                    | Methanol/water<br>Isocratic elution                  | 1.0                                  | $R_s$ >1.0                                                         | 32                | [9]  |
| Hypersil Green<br>PAH, 5 μm                        | 5 PAHs   | 250 × 4.6                    | Acetonitrile/water<br>Gradient elution               | 1.0                                  | ND                                                                 | 28                | [10] |
| CNT-poly(benzyl<br>methacrylate)                   | 10 PAHs  | 200 × 0.1                    | Acetonitrile/water<br>Gradient elution               | 0.5<br>μL min <sup>-1</sup>          | $R_s$ : 1.74–3.98<br>$N$ : 11,500–41,700<br>plates m <sup>-1</sup> | 13                | [11] |
| LiChrospher 100<br>RP-8 endcapped,<br>5 μm         | 5 PAHs   | 150 × 4.6                    | Acetonitrile/water<br>Isocratic elution              | 1.0                                  | ND                                                                 | 10                | [12] |
| HALO 90 Å PAH,<br>2.7 μm                           | 16 PAHs  | 50 × 4.6                     | Acetonitrile/water<br>Gradient elution               | 2.0                                  | $R_s$ : ≥1.13                                                      | 5                 | [13] |
| ZORBAX Eclipse<br>95 Å PAH, 1.8 μm                 | 16 PAHs  | 50 × 4.6                     | Acetonitrile/water<br>Gradient elution               | 3.0                                  | $R_s$ : ≥1.36                                                      | 3                 | [13] |
| Kinetex EVO-C18,<br>5 μm                           | 10 PAHs  | 150 × 4.6                    | Acetonitrile/<br>methanol/water<br>Isocratic elution | 1.5                                  | $R_s$ : ≥1.5                                                       | 16                | [14] |
| Eclipse Plus C18, 5<br>μm                          | 7 PAHs   | 150 × 4.6                    | Acetonitrile/water<br>Gradient elution               | 1.0                                  | ND                                                                 | 29                | [15] |
| MIL-53(Al) MOF                                     | 7 PAHs   | 100 × 4.6                    | Acetonitrile/water<br>Gradient elution               | 0.35                                 | $R_s$ : 2.02–11.05<br>$N$ : 5700–63200<br>plates m <sup>-1</sup>   | 22                | [16] |
| Zorbax Eclipse<br>PAH, 3.5 μm                      | 24 PAHs  | 100 × 2.1                    | Acetonitrile/water<br>Isocratic elution              | 0.237                                | ND                                                                 | 80                | [17] |
| Poroshell 120 EC-<br>C18, 2.7 μm                   | 24 PAHs  | 50 × 2.1                     | Acetonitrile/water<br>Isocratic elution              | 0.131                                | ND                                                                 | 25                | [17] |
| Kinetex PAH, 3.5<br>μm                             | 17 PAHs  | 150 × 4.6                    | Acetonitrile/water<br>Gradient elution               | 1.0                                  | ND                                                                 | 20                | [18] |
| Montmorillonite-<br>poly(glycidyl<br>methacrylate) | 7 PAHs   | 220 × 0.25                   | Acetonitrile/water<br>Gradient elution               | 0.5<br>μL min <sup>-1</sup>          | $R_s$ : 1.85–5.83<br>$H$ : 17–42 μm                                | 12                | [19] |
| Supelcosil LC-<br>PAH, 5 μm                        | 15 PAHs  | 250 × 4.6                    | Acetonitrile/water<br>Gradient elution               | 1.0                                  | ND                                                                 | 22.5              | [20] |



|                                                                          |         |                  |                                     |     |                                                 |    |           |
|--------------------------------------------------------------------------|---------|------------------|-------------------------------------|-----|-------------------------------------------------|----|-----------|
| Zorbax Eclipse C18 Plus, 5 $\mu\text{m}$                                 | 4 PAHs  | 250 $\times$ 4.6 | Acetonitrile/water Gradient elution | 1.0 | ND                                              | 35 | [21]      |
| Agilent C18, 5 $\mu\text{m}$                                             | 24 PAHs | 250 $\times$ 4.6 | Acetonitrile/water Gradient elution | 2.2 | ND                                              | 26 | [22]      |
| Pursuit PAH, 5 $\mu\text{m}$                                             | 11 PAHs | 250 $\times$ 4.6 | Acetonitrile/water Gradient elution | 0.5 | ND                                              | 36 | [23]      |
| Zorbax Eclipse PAH, 1.8 $\mu\text{m}$                                    | 15 PAHs | 50 $\times$ 4.6  | Acetonitrile/water Gradient elution | 1.0 | ND                                              | 14 | [24]      |
| Nucleosil C18 PAH, 5 $\mu\text{m}$                                       | 8 PAHs  | 150 $\times$ 4.0 | Acetonitrile/water Gradient elution | 0.8 | ND                                              | 45 | [25]      |
| Silica-UIO-66 composite                                                  | 3 PAHs  | 100 $\times$ 2.1 | Hexane Isocratic elution            | 0.4 | $R_s: \geq 0.886$                               | 8  | [26]      |
| Column C <sub>2</sub> <sup>3</sup><br>Column C <sub>3</sub> <sup>4</sup> | 9 PAHs  | 50 $\times$ 2.1  | Acetonitrile/water Gradient elution | 0.1 | $R_s: 1.11-4.63$<br>$H: 4.08-39.49 \mu\text{m}$ | 32 | this work |

<sup>1</sup>Chromatographic evaluation: Main chromatographic parameters measured in the study (if any). <sup>2</sup>ND: Not determined.

<sup>3</sup>Poly(itaconic anhydride-co-ethylene dimethacrylate) modified with octadecylamine. <sup>4</sup>Poly(itaconic anhydride-co-ethylene dimethacrylate) modified with benzylamine.

## References related the comparison study

- [1] N.N.Z. Abidin, M.M. Sanagi, W.A.W. Ibrahim, S. Endud and D.S.M. Shukri, Portable micro-solid phase extraction for the determination of polycyclic aromatic hydrocarbons in water samples, *Anal. Methods*, 2014, 6, 5512–5518.
- [2] K.-J. Huang, Y.-J. Liu, J. Li, T. Gan and Y.-M. Liu, Ultra-trace determination of polycyclic aromatic hydrocarbons using solid-phase extraction coupled with HPLC based on graphene-functionalized silica gel composites, *Anal. Methods*, 2014, 6, 194–201.
- [3] E.M. Reyes-Gallardo, R. Lucena, S. Cárdenas and M. Valcárcel, Magnetic nanoparticles-nylon 6 composite for the dispersive micro solid phase extraction of selected polycyclic aromatic hydrocarbons from water samples, *J. Chromatogr. A*, 2014, 1345, 43–49.
- [4] A. Aqel, Z.A. ALOthman, A.-Y. Badjah-Hadj-Ahmed, K. Yusuf and A.A. Alwarthan, Preparation and evaluation of benzyl methacrylate monoliths for capillary chromatography, *J. Chromatogr. Sci.*, 2014, 52, 201–210.
- [5] M. Shamsipur and B. Hashemi, Extraction and determination of polycyclic aromatic hydrocarbons in water samples using stir bar sorptive extraction (SBSE) combined with dispersive liquid–liquid microextraction based on the solidification of floating organic drop (DLLMESFO) followed by HPLC-UV, *RSC Adv.*, 2015, 5, 20339–20345.
- [6] A. Aqel, K. Yusuf, Z.A. ALOthman and A.-Y. Badjah-Hadj-Ahmed, Sporopollenin microparticle-based monolithic capillary columns for liquid chromatography, *Chromatographia*, 2015, 78, 481–486.
- [7] W. Song, M. Guo, Y. Zhang, Y. Yang, X. Wang and X. Du, Hydroxyundecanethiol-modified steel fibers for the selective solid-phase microextraction of polycyclic aromatic hydrocarbons from river and wastewater, *Anal. Lett.*, 2017, 50, 1372–1385.
- [8] K. Yusuf, A. Aqel, A. Dyab, Z.A. ALOthman and A.-Y. Badjah-Hadj-Ahmed, Effect of sporopollenin microparticle incorporation into the hexyl methacrylate-based monolithic columns for capillary liquid chromatography, *J. Liq. Chromatogr. Rel. Tech.*, 2016, 39, 752–761.
- [9] T.M. Gutiérrez-Valencia and M.P. García de Llasera, On-line MSPD-SPE-HPLC/FLD analysis of polycyclic aromatic hydrocarbons in bovine tissues, *Food Chem.*, 2017, 223, 82–88.
- [10] A. Zachara, D. Gałkowska and L. Juszczak, Method Validation and Determination of Polycyclic Aromatic Hydrocarbons in Vegetable Oils by HPLC-FLD, *Food Anal. Meth.*, 2017, 10, 1078–1086.
- [11] A. Al-Rifai, A. Aqel, L. Al Wahibi, Z.A. ALOthman and A.-Y. Badjah-Hadj-Ahmed, Carbon nanotube-based benzyl polymethacrylate composite monolith as a solid phase extraction adsorbent and a stationary phase material for simultaneous extraction and analysis of polycyclic aromatic hydrocarbon in water, *J. Chromatogr. A*, 2018, 1535, 17–26.
- [12] J. Vichapong, Y. Santaladchaiyakit, R. Burakham and S. Srijaranai, Magnetic stirring assisted demulsification dispersive liquid–liquid microextraction for preconcentration of polycyclic aromatic hydrocarbons in grilled pork samples, *Toxics*, 2019, 7, 8.
- [13] J.M. Godinho, J. Lawhorn and B.E. Boyes, Rapid analysis of polycyclic aromatic hydrocarbons, *J. Chromatogr. A*, 2020, 1628, 461432.

- [14] M.M. Arce, S. Sanlloriente, S. Ruiz, M.S. Sánchez, L.A. Sarabia and M.C. Ortiz, Method operable design region obtained with a partial least squares model inversion in the determination of ten polycyclic aromatic hydrocarbons by liquid chromatography with fluorescence detection, *J. Chromatogr. A*, 2021, 1657, 462577.
- [15] D.-Y. Kim, B.-E. Lee and H.-S. Shin, Determination of polycyclic aromatic hydrocarbons (PAHs) in smoking cessation aids by using high-performance liquid chromatography, *Anal. Biochem.*, 2021, 617, 114119.
- [16] A. Aqel, N. Alkatheri, A. Ghfar, A.M. Alsubhi, Z.A. AlOthman and A.-Y. Badjah-Hadj-Ahmed, Preparation of value-added metal-organic frameworks for high-performance liquid chromatography. Towards green chromatographic columns, *J. Chromatogr. A*, 2021, 1638, 461857.
- [17] S. Chatzimichail, F. Rahimi, A. Saifuddin, A.J. Surman, S.D. Taylor-Robinson and A. Salehi-Reyhani, Hand-portable HPLC with broadband spectral detection enables analysis of complex polycyclic aromatic hydrocarbon mixtures, *Comm. Chem.*, 2021, 4, 17.
- [18] Z. Temerdashev, S. Prasad, T. Musorina, T. Chervonnaya and Z. Arutyunyan, Simultaneous dispersive liquid–liquid microextraction and determination of different polycyclic aromatic hydrocarbons in surface water, *Molecules*, 2022, 27, 8586.
- [19] A. Aqel, M. Obbed, A. A. Ghfar, K. Yusuf, A.M. Alsubhi and A. Badjah-Hadj-Ahmed, Naturally occurring montmorillonite-based polymer monolith composites as stationary phases for capillary liquid and gas chromatography, *Separations*, 2022, 9, 389.
- [20] M. Polak-Sliwinska, B. Paszczyk and M. Sliwinski, Evaluation of polycyclic aromatic hydrocarbons in smoked cheeses made in Poland by HPLC method, *Molecules*, 2022, 27, 6909.
- [21] S.Y. Kim, H.W. Shin, G.H. Kim, Y.-Y. Kim, M.-J. Kang and H.-S. Shin, Risk assessment and evaluation of analytical method of polycyclic aromatic hydrocarbons (PAHs) for deep-fat fried pork products in Korea, *Foods*, 2022, 11, 1618.
- [22] X. Guo, F. Chen and W. Zhang, Pollution, source and risk assessment of PAHs in Chinese tea, *LWT- Food Sci. Tech.*, 2022, 167, 113851.
- [23] M. Woźniak, K. Hoppe and K. Drzewiecka, Determination of polycyclic aromatic hydrocarbon content in garden herbal plants using liquid chromatographic analysis (HPLC-FL), *Plants*, 2023, 12, 551.
- [24] D.W. Allgaier-Díaz, M.J. Trujillo-Rodríguez, J.H. Ayala, D.D. Díaz and V. Pino, Unmodified biopolymers as sustainable microextraction materials for the environmental monitoring of polycyclic aromatic hydrocarbons and personal care products, *Microchem. J.*, 2023, 191, 108873.
- [25] S. Sousa, P. Paíga, D. Pestana, G. Faria, C. Delerue-Matos, M.J. Ramalhosa, C. Calhaub and V.F. Domingues, Optimization of a simple, effective, and greener methodology for polycyclic aromatic hydrocarbon extraction from human adipose tissue, *Anal. Methods*, 2023, 15, 1722–1733.
- [26] Z. Yan, J. Zheng, J. Chen, P. Tong, M. Lub, Z. Lina, L. Zhang, Preparation and evaluation of silica-UIO-66 composite as liquid chromatographic stationary phase for fast and efficient separation, *J. Chromatogr. A*, 2014, 1366, 45–53.
